# Supplementary material
Source: ML conference proceedings conference paper supplement (https://openreview.net/forum?id=UvBPbpvHRj-)

auNN-RBF

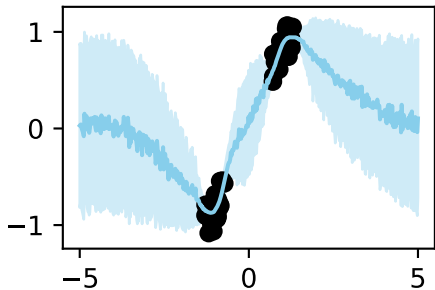

auNN-TRI

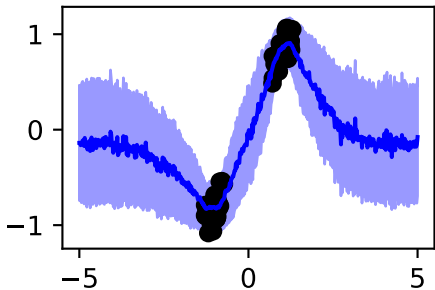

Supplement: supplementary_material [file attachment]
